# Supplementary material for: Epiphany: predicting Hi-C contact maps from 1D epigenomic signals
Source: Springer Nature journal article supplement (doi:10.1186/s13059-023-02934-9), 2023-06-06
Supplement: MOESM1 [file 13059_2023_2934_MOESM1_ESM.pdf]

# Supplementary Information

## Model Architecture Details

In the following tables, we describe in detail Epiphany’s architecture. In each table,  $n$  is the total number of Hi-C stripes we seek to predict.

| Operation            | Number of Filters | Filter Size   | Stride | Activation | Output Shape               |
|----------------------|-------------------|---------------|--------|------------|----------------------------|
| Input                | -                 | -             | -      | -          | $n \times 5 \times 14000$  |
| Convolution          | 70                | $5 \times 17$ | 1      | ReLU       | $n \times 70 \times 13984$ |
| Max Pool             | 1                 | $1 \times 4$  | 1      | -          | $n \times 70 \times 3496$  |
| Dropout ( $p = .1$ ) | -                 | -             | -      | -          | $n \times 70 \times 3496$  |
| Convolution          | 90                | $70 \times 7$ | 1      | ReLU       | $n \times 90 \times 3490$  |
| Max Pool             | 1                 | $1 \times 4$  | 1      | -          | $n \times 90 \times 872$   |
| Dropout ( $p = .1$ ) | -                 | -             | -      | -          | $n \times 90 \times 872$   |
| Convolution          | 70                | $90 \times 5$ | 1      | ReLU       | $n \times 70 \times 868$   |
| Max Pool             | 1                 | $1 \times 4$  | 1      | -          | $n \times 70 \times 217$   |
| Dropout ( $p = .1$ ) | -                 | -             | -      | -          | $n \times 70 \times 217$   |
| Convolution          | 20                | $70 \times 5$ | 1      | ReLU       | $n \times 20 \times 213$   |
| Adaptive Max Pool    | 1                 | -             | 1      | -          | $n \times 20 \times 45$    |
| Dropout ( $p = .1$ ) | -                 | -             | -      | -          | $n \times 20 \times 45$    |
| Flatten              | -                 | -             | -      | -          | $n \times 900$             |

**Table 1:** Parameterization for 1D CNN for 5kb and 10kb Hi-C prediction

| Operation | Hidden Layer Size | Activation | Output Shape    |
|-----------|-------------------|------------|-----------------|
| Bi-LSTM   | 1200              | ReLU       | $n \times 2400$ |
| Bi-LSTM   | 1200              | ReLU       | $n \times 2400$ |
| Bi-LSTM   | 2400              | ReLU       | $n \times 2400$ |
| Dense     | -                 | ReLU       | $n \times 900$  |
| Dense     | -                 | None       | $n \times 100$  |

**Table 2:** Parameterization for Bi-LSTM for 10kb Hi-C prediction

| Operation | Hidden Layer Size | Activation | Output Shape    |
|-----------|-------------------|------------|-----------------|
| Bi-LSTM   | 2400              | ReLU       | $n \times 4800$ |
| Bi-LSTM   | 2400              | ReLU       | $n \times 4800$ |
| Dense     | -                 | ReLU       | $n \times 1200$ |
| Dense     | -                 | None       | $n \times 200$  |

**Table 3:** Parameterization for Bi-LSTM for 5kb Hi-C prediction

## Supplementary Figures

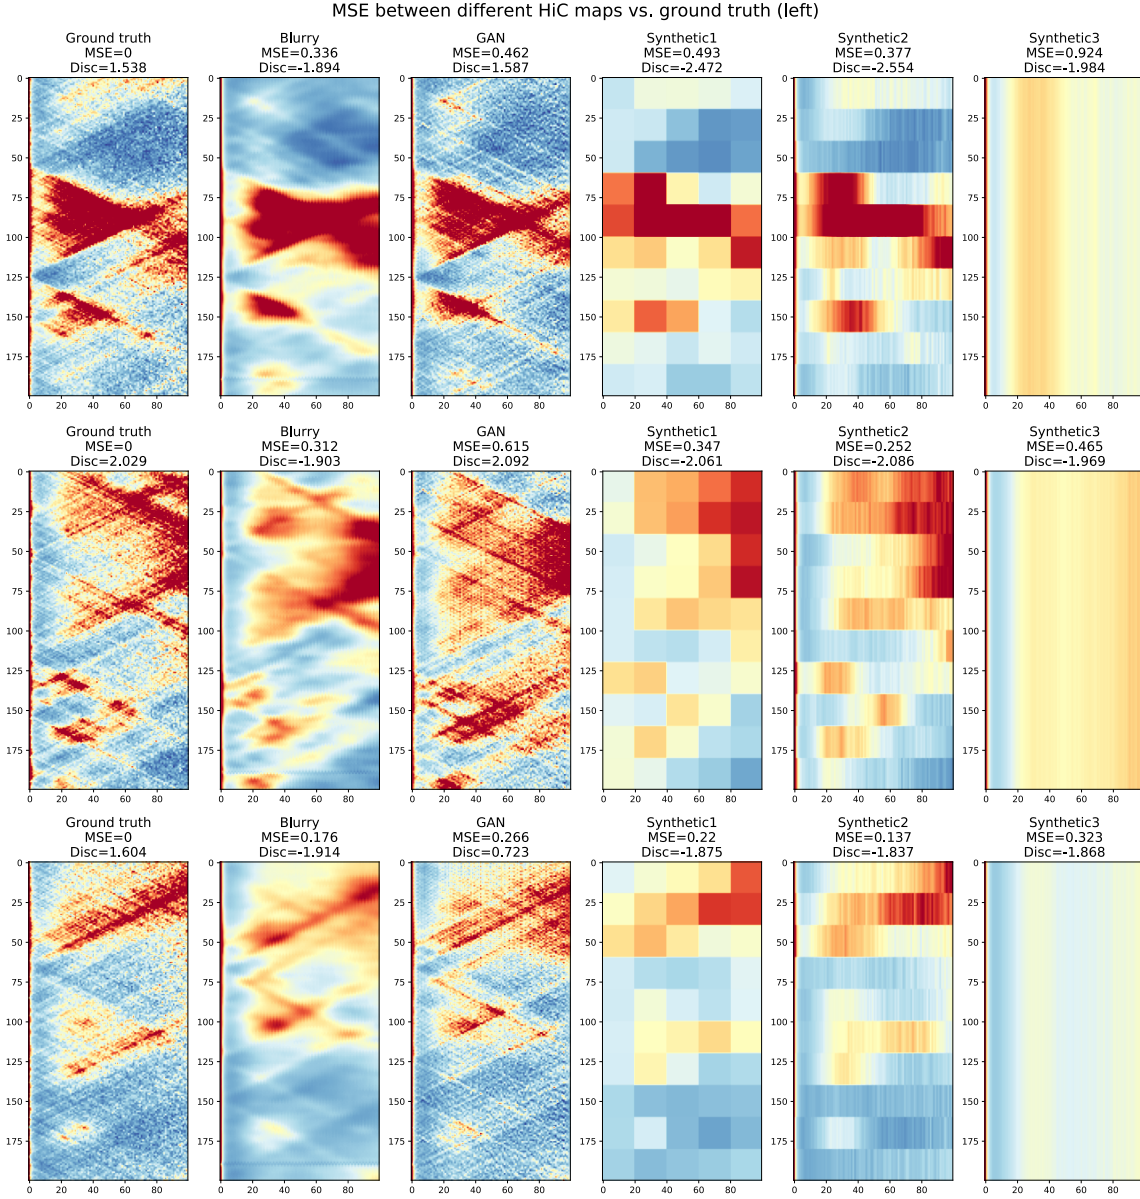

**Supplementary Figure S1: MSE and GAN score for Hi-C matrix evaluations.** Three random example on test chromosome 3 are shown. Each Hi-C map is rotated: the y-axis on the left shows the genomic coordinates, and the x-axis shows the distance from the diagonal. From left to right we plot: the ground truth Hi-C map, the prediction from MSE model, the prediction from GAN model, synthetic Hi-C map 1 (local average of the Hi-C map), synthetic Hi-C map 2 (local average for each genomic distance on the Hi-C map), synthetic Hi-C map 3 (averaged value at each genomic distance). The MSE value compared with ground truth, and the discriminator score calculated from the well-trained discriminator are shown in the subtitles.



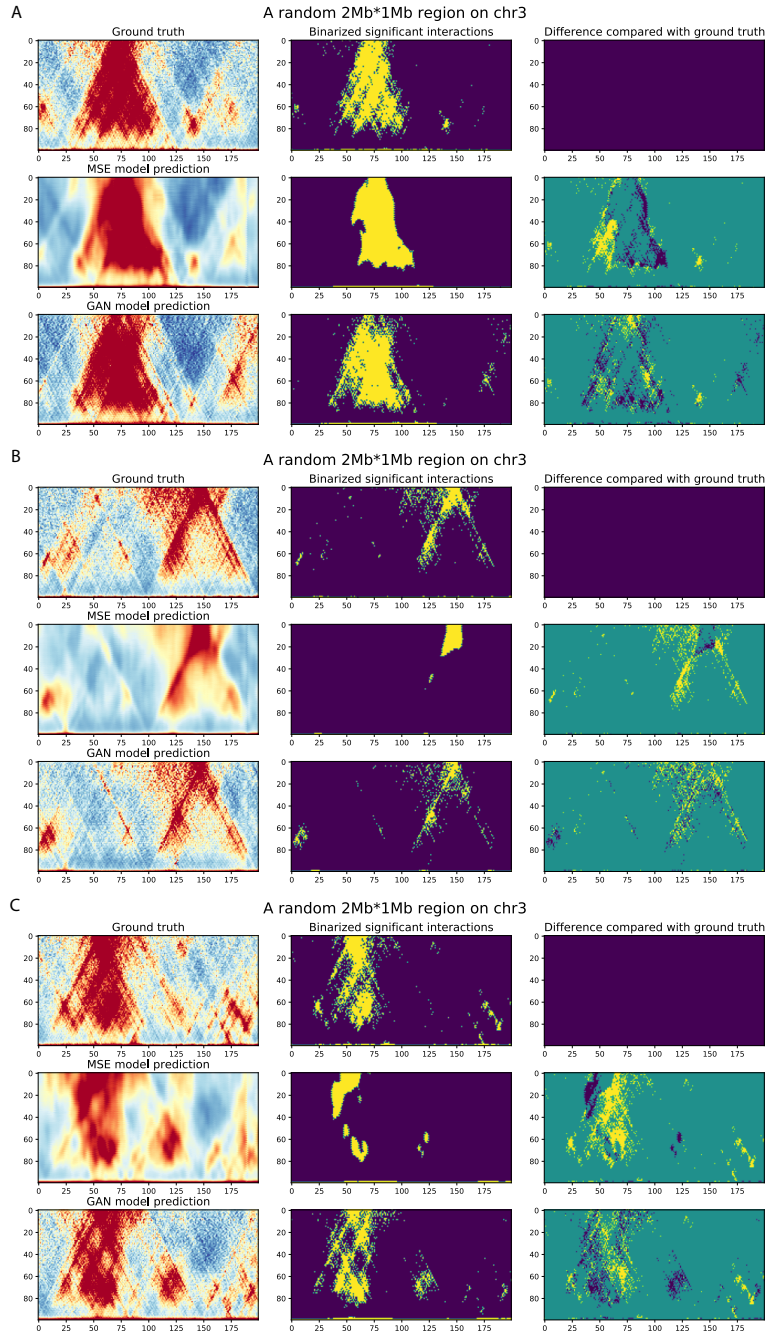

**Supplementary Figure S2: Binarized predictions show incorrect structure for MSE-only model.** In each example, a random region on test chromosome 3 of GM12878 (size: 2Mb along the diagonal, 1Mb from the diagonal) is shown. The left column shows the Hi-C map of ground truth (top), prediction from MSE-only trained model (middle), and prediction from the MSE+GAN model (bottom), using observed-over-expected count ratio as target values. The middle column shows the significant interactions called from each map, where interactions  $\geq 2$  are marked as 1 ("significant"), and interaction  $< 2$  are marked as 0 ("not significant"). The right column shows the absolute difference of the significance plot (green=0, no difference; yellow = 1, false negatives, purple = -1, false positives). (A) 1496 bins were falsely predicted in the MSE-only blurry prediction, and 1815 bins falsely predicted in the MSE+GAN model prediction. (B) 1003 falsely predicted bins for the MSE-only model and 1249 for the MSE+GAN model. In this case, the MSE-only model detects a blob at the apex of the TAD but misses the edge structure. (C) 1962 bins vs. 2007 bins falsely predicted in MSE-only and MSE+GAN model.

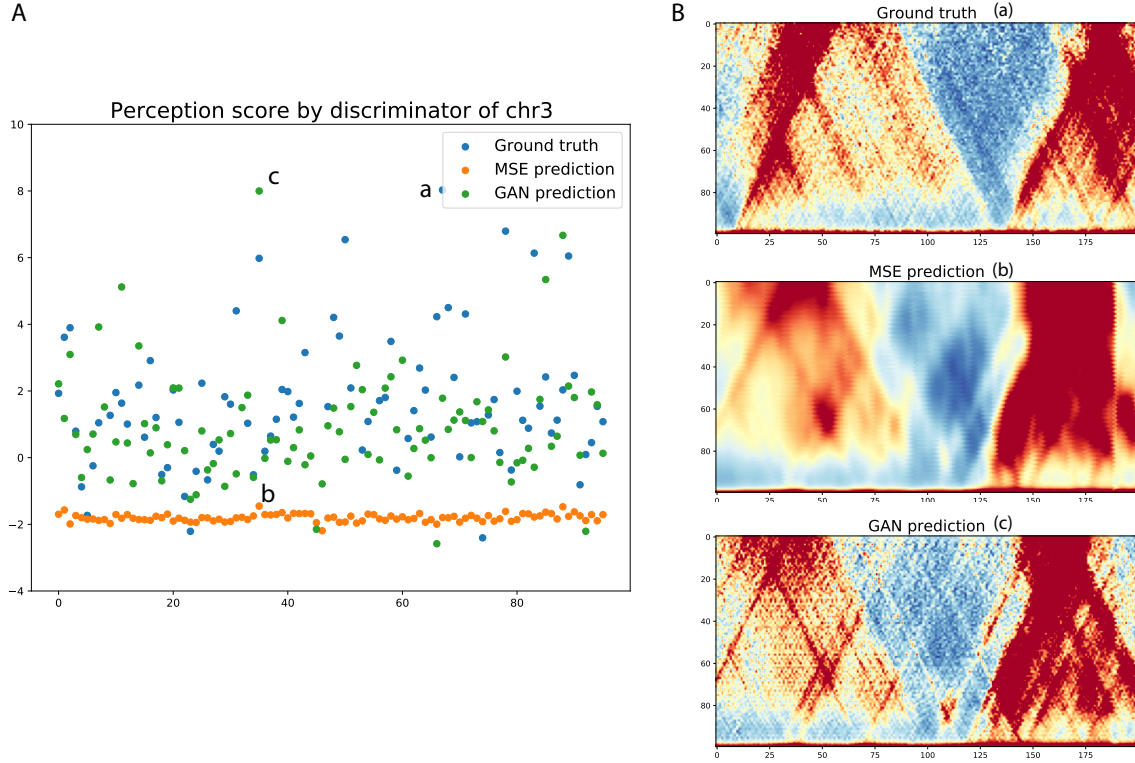

**Supplementary Figure S3: Evaluating predictions with well-trained discriminator.** (A) Perceptual score for all sub-regions ( $200 \times 100$ , 2Mb along the diagonal, 1M from the diagonal) predicted on chr3. X-axis shows the genomic location of each  $2\text{Mb} \times 1\text{Mb}$  sub-region along the diagonal, and y-axis shows the perceptual score. Blue dots show the perceptual score for ground truth Hi-C, green dots for the GAN prediction, and orange for the MSE-only prediction. All contact maps predicted by the MSE-only model obtain very low perceptual scores. (B) Example regions with the highest perceptual score in ground truth (a), MSE-only prediction (b), and MSE+GAN model prediction (c). Note that the ground truth example (a) corresponds to a different genomic location than the two predictions (b) and (c).

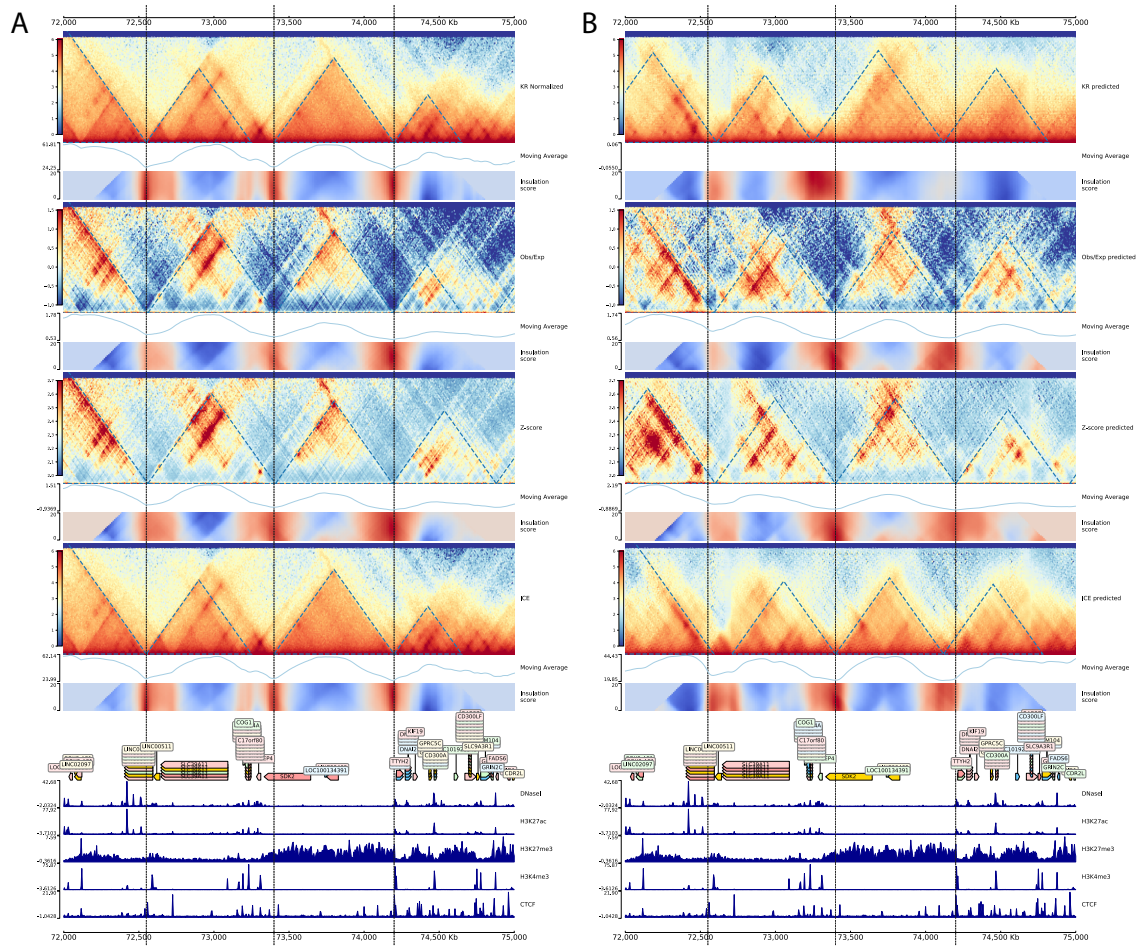

**Supplementary Figure S4: Ground truth, Epiphany predictions with epigenomic tracks.** Pearson correlation of insulation score on the three test chromosomes (chr3, 11, 17) of MSE only model vs. ground truth (blue), and MSE+GAN model vs. ground truth (red).

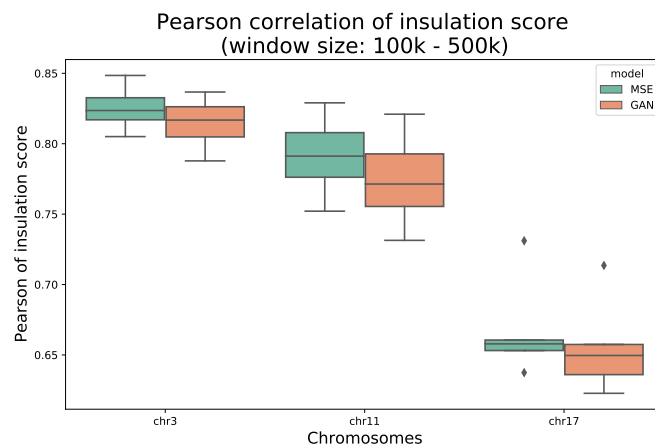

**Supplementary Figure S5: TAD calling evaluation via Pearson correlation of insulation scores.** Pearson correlation of insulation score on the three test chromosomes (chr3, 11, 17) of MSE only model vs. ground truth (blue), and MSE+GAN model vs. ground truth (red). Pearson correlation table is attached in Additional file 5.

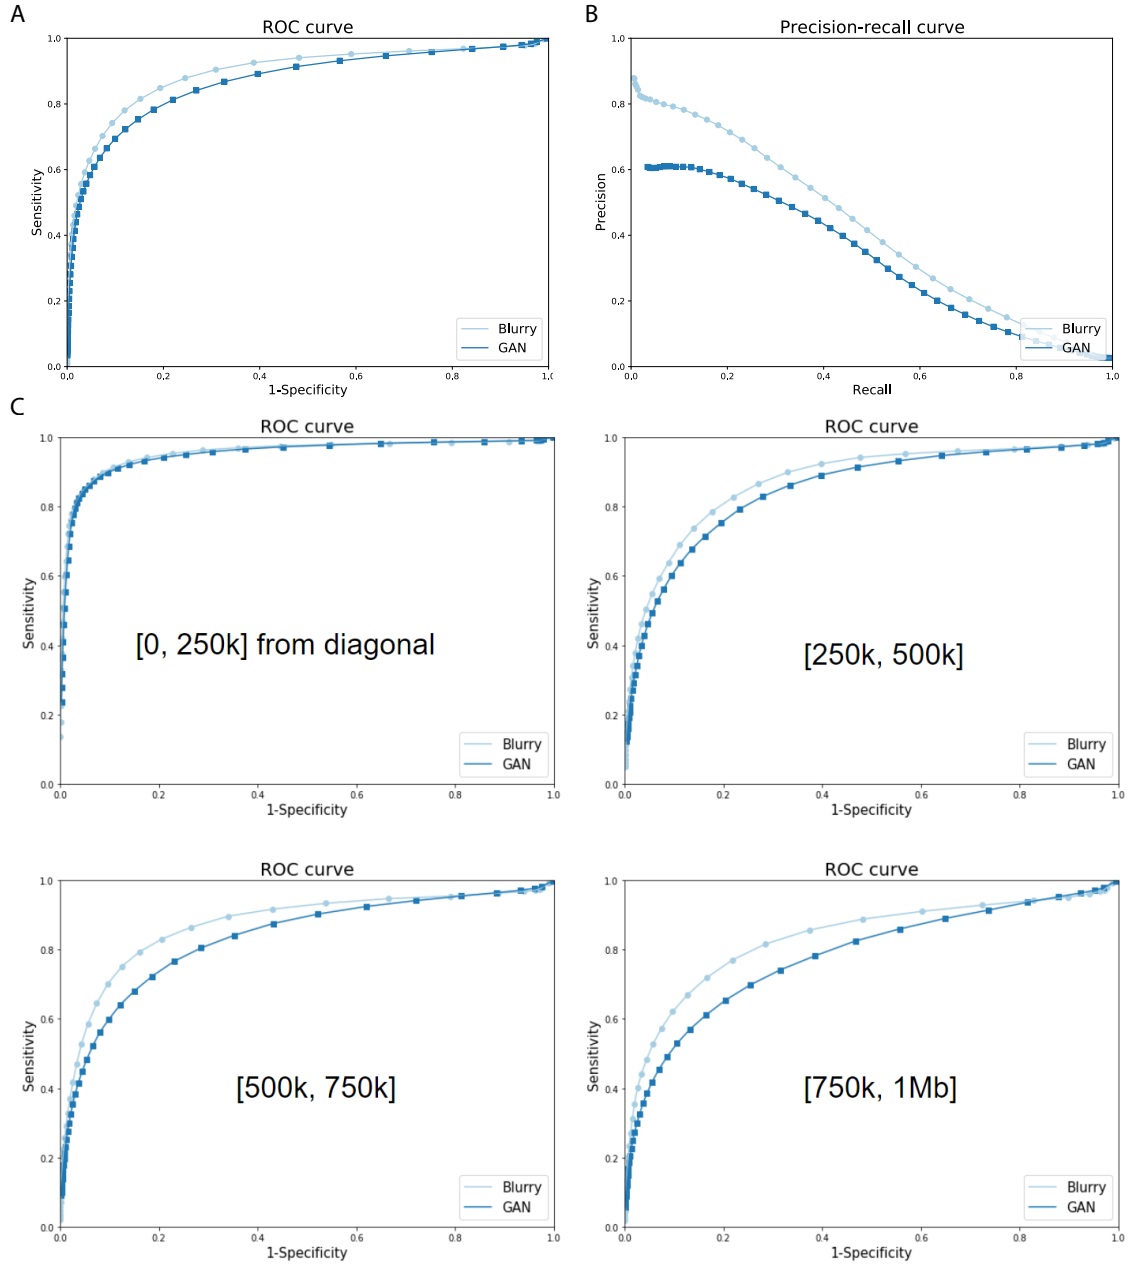

**Supplementary Figure S6: Performance of MSE-only ("blurry") and MSE+GAN ("GAN") models using observed-over-expected count ratio target for detection of significant interactions. (A) ROC curve for the two models for detection of significant interactions. True positives defined by ground truth HiC-DC+ z-score of 3 or greater. (B) Precision-recall curve of the two models. (C) Genomic distance-stratified ROC curve.**



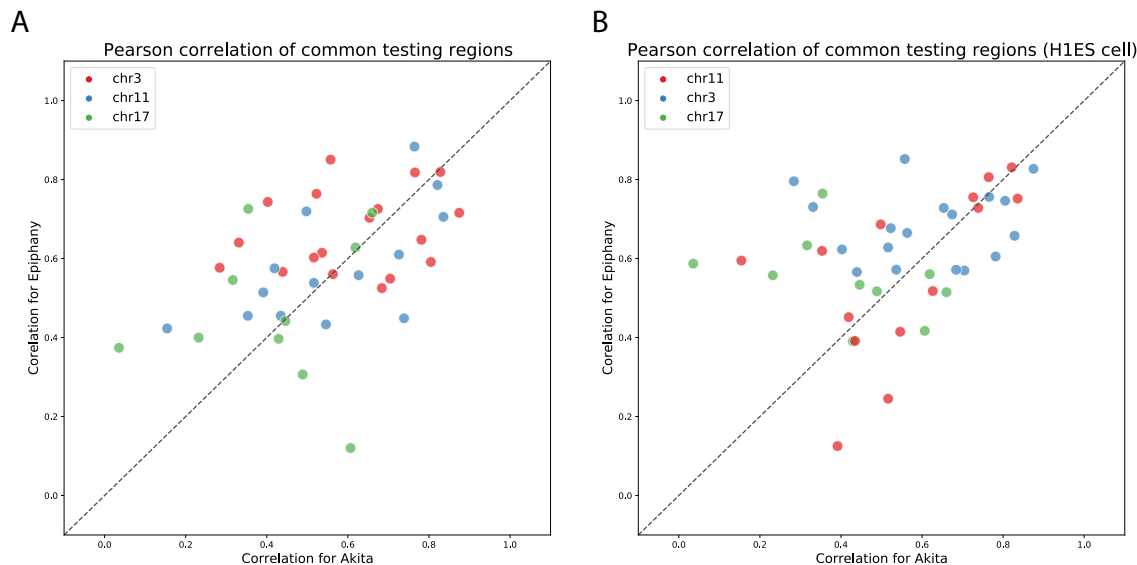

**Supplementary Figure S7: Comparison between Akita and Epiphany on GM12878 and H1-hESC.** (A) Model performance comparison between Epiphany and Akita on 42 common regions between Akita held-out test regions and our test chromosomes (chr3, 11, 17) in GM12878. The x-axis shows the Pearson correlation of Akita prediction vs. ground truth, and the y-axis shows the correlation of Epiphany. Epiphany was re-trained using data with the same normalization steps of Akita at 5 kb resolution, and Akita predictions were average-pooled into 4096 bp resolution for better comparison. Dots are colored by chromosomes. (B) Model performance comparison on H1-h1ESC.

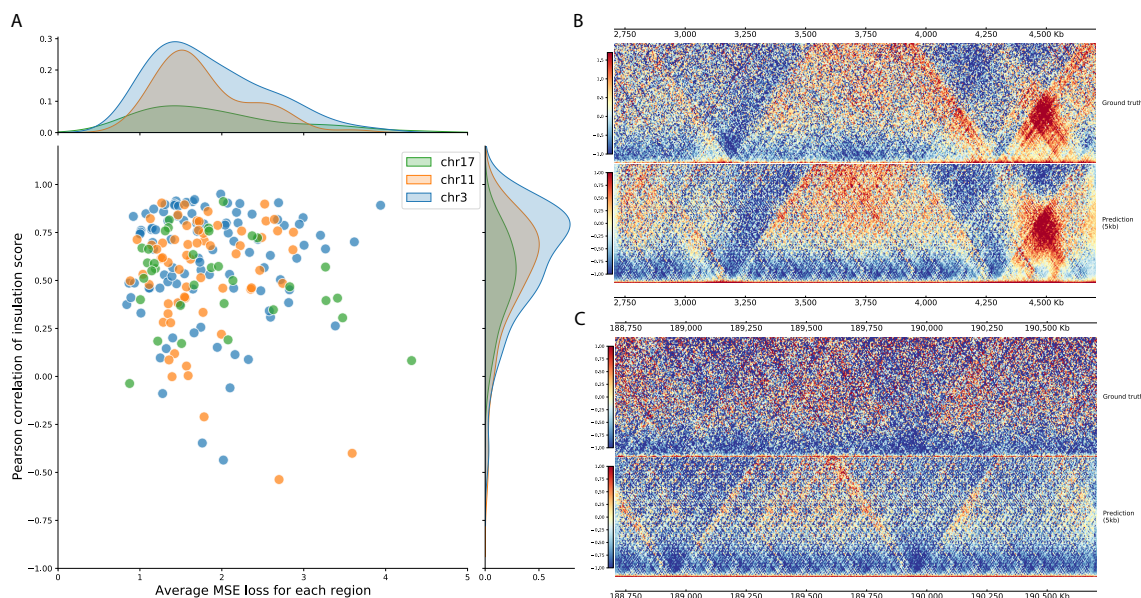

**Supplementary Figure S8: Genome-wide evaluation of cell-type specific prediction on K562.** Epiphany is trained on GM12878 training chromosomes (all chromosomes except for 3, 11, 17), and tested on K562 (cross-cell type, cross-chromosomal prediction). (A) An overview of Epiphany's performance on K562. Each dot corresponds to a 2Mb along the diagonal by 1Mb from the diagonal region, colored by chromosome. The x-axis shows the average MSE loss between Epiphany's prediction vs. ground truth, and the y-axis shows the Pearson correlation of the insulation score in this region. The majority of the regions have a Pearson correlation higher than 0.5. (B) A well predicted region. (C) A poorly predicted region.

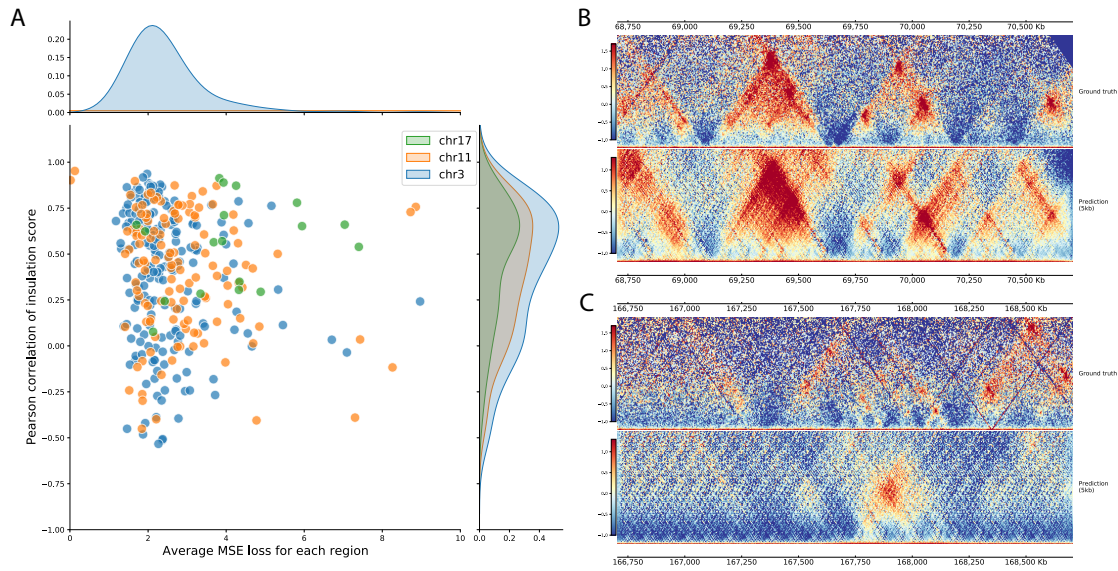

**Supplementary Figure S9: Genome-wide evaluation of cell-type-specific predictions in heart left ventricle.** Epiphany is trained on GM12878 training chromosomes (all chromosomes except for 3, 11, 17) and tested on heart left ventricle (cross-cell type, cross-chromosomal prediction). **(A)** An overview of Epiphany's performance on heart left ventricle. Each dot corresponds to a 2Mb along the diagonal by 1Mb from the diagonal region, colored by chromosome. The x-axis shows the average MSE loss between Epiphany's prediction vs. ground truth, and the y-axis shows the Pearson correlation of the insulation score in this region. The majority of the regions have a Pearson correlation higher than 0.5. **(B)** A well predicted region. **(C)** A poorly predicted region.

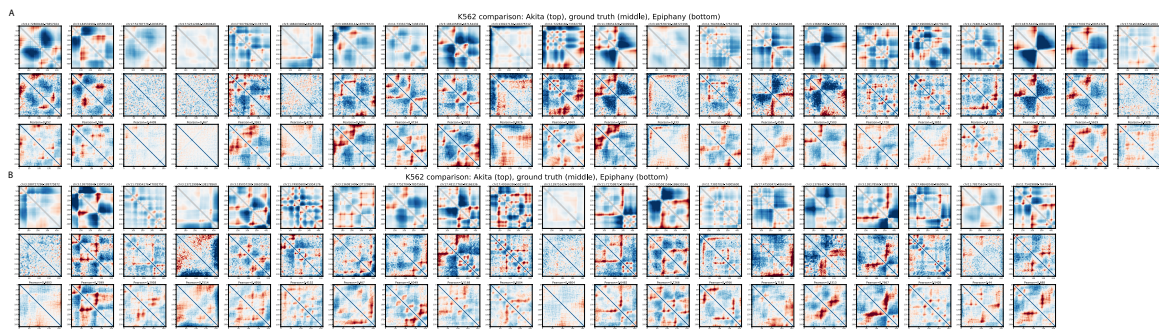

**Supplementary Figure S10: Cell-type-specific predictions in K562 compared with Akita.** Epiphany is trained on GM12878 training chromosomes (all chromosomes except for 3, 11, 17) and tested on K562 (cross-cell type, cross-chromosomal prediction). Akita prediction is the averaged prediction of five pre-trained cell types including GM12878, H1-hESC, HFF, HCT116, IMR90. **(A)** Conserved regions. Top row: averaged Akita prediction of 5 cell types (GM12878, hH1-hESC, IMR90, HCT116, HFF) on test regions. Middle row: ground truth contact map on K562. Bottom row: Epiphany prediction on K562. Pearson correlations between Epiphany prediction and ground truth are on the top. **(B)** Non-conserved regions. Rows as in **(A)**.



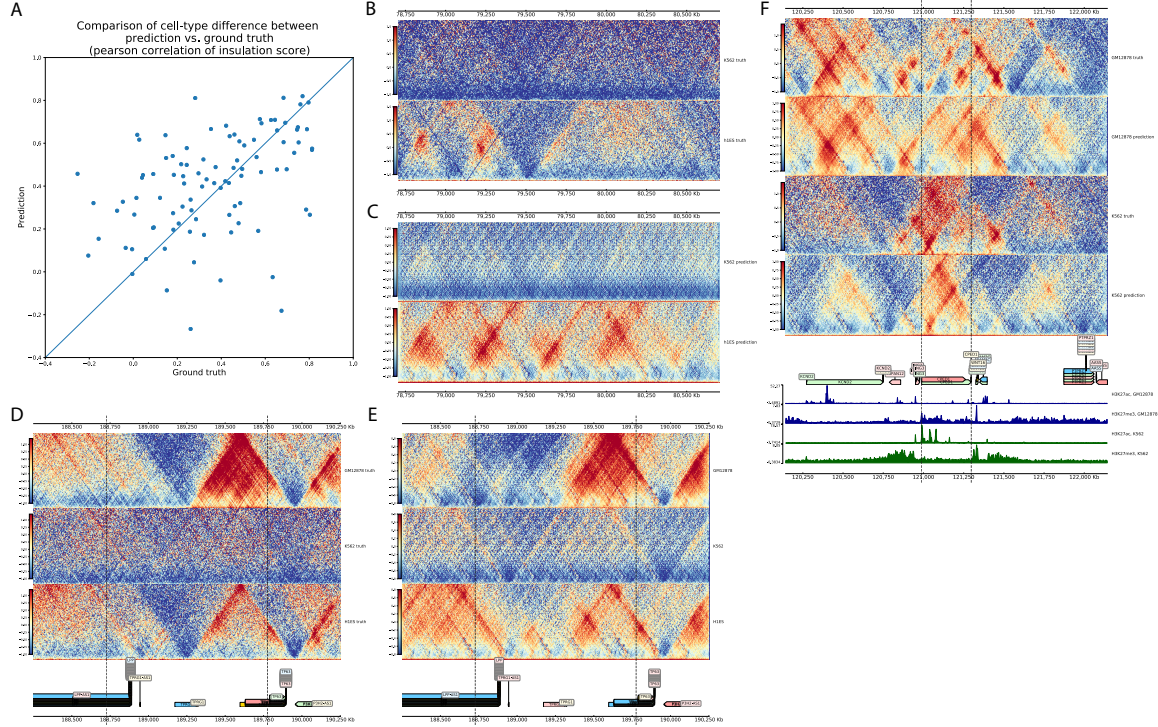

**Supplementary Figure S11: Cell-type specific prediction of Epiphany.** (A) Pearson correlation of the insulation scores between H1-hESC and K562 cells in ground truth (x-axis) and Epiphany predictions (y-axis). (B) Ground truth of a cell-type specific region (chr3:78,705,000-80,705,000) between H1-hESC (top) and K562 (bottom). (C) Epiphany prediction of the cell-type specific region between the two cell types. (D) Ground truth of a cell-type specific region (chr3:188,250,000-190,250,000) in GM12878 (top), K562 (middle) and H1-hESC (bottom). (E) Epiphany's cell-type specific prediction of the region (chr3:188,250,000-190,250,000). (F) Cell-type specific prediction around gene CPED1 locus: (top to bottom) GM12878 ground truth structure, GM12878 contact map predicted by Epiphany; K562 ground truth, K562 contact map predicted by Epiphany; gene annotations; and epigenomic tracks (H3K27ac, H3K27me3) for the two cell types.

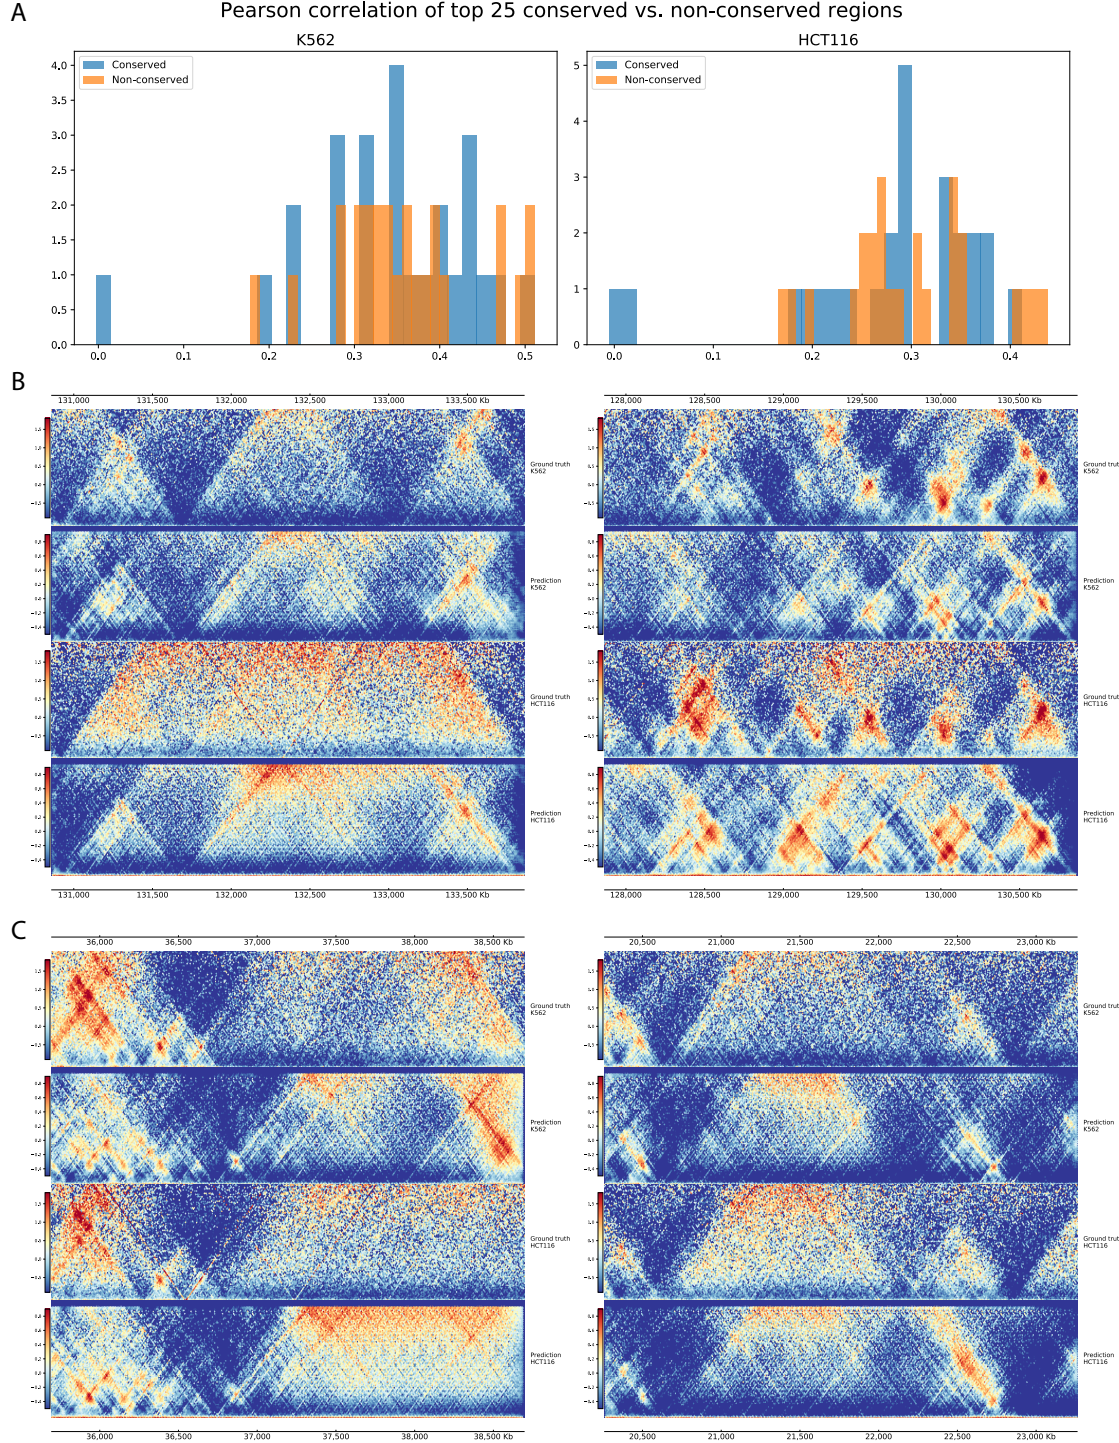

**Supplementary Figure S12: Comparison of K562 and HCT116 on conserved and non-conserved regions.** Epiphany is trained on GM12878 training chromosomes (all chromosomes except for 3, 11, 17), and tested on chromosome 11 for K562 and HCT116. **(A)** Pearson correlation between prediction vs. ground truth for top 25 conserved regions (blue) and non-conserved regions (orange) for K562 and HCT116. Conserved and non-conserved regions between the two cell types are identified by hicExplorer. **(B)** Visual examples of ground truth and prediction of top non-conserved regions. Top to bottom: K562 ground truth, K562 prediction, HCT116 ground truth, HCT116 prediction. **(C)** Visual examples of ground truth and prediction of top conserved regions between the two cell types.



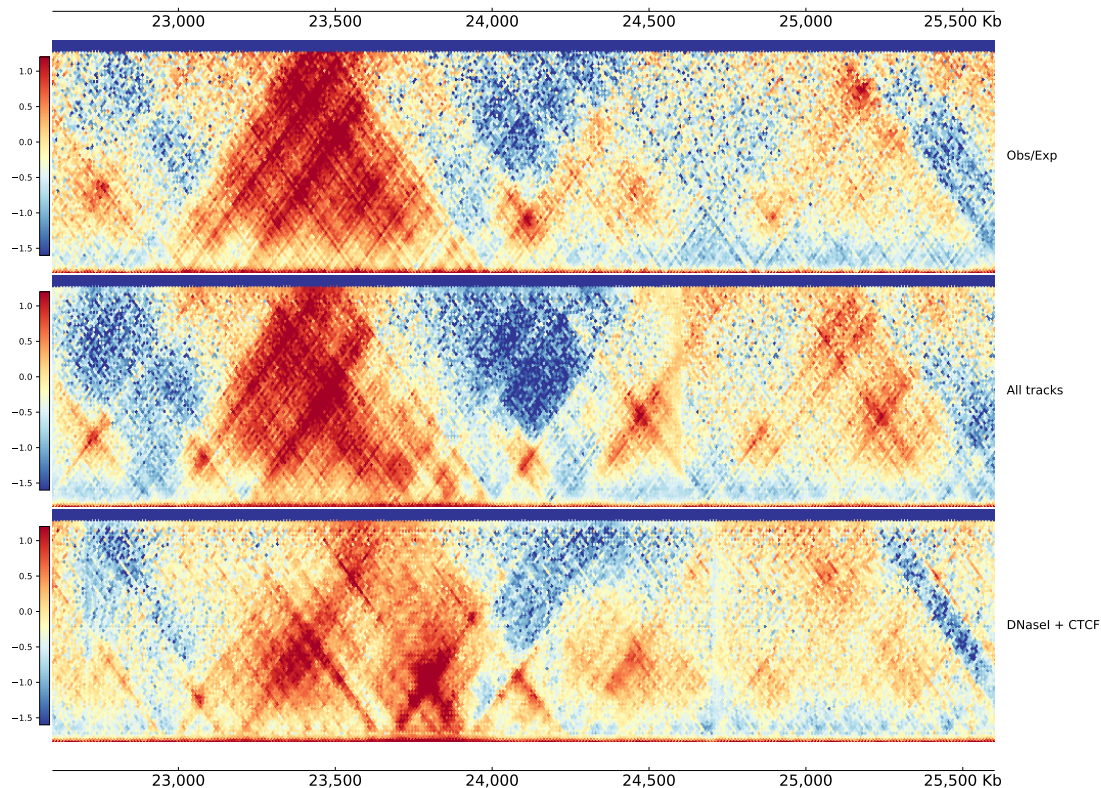

**Supplementary Figure S13: Visual comparison of DNaseI + CTCF only prediction.** A random region (chr3:123,675,000-126,675,000) in test chromosome 3 for ground truth (top), Epiphany prediction using all five tracks: DNaseI, H3K27ac, H3K27me3, H3K4me4, CTCF (middle), and Epiphany prediction using only two tracks: DNaseI, CTCF (bottom).

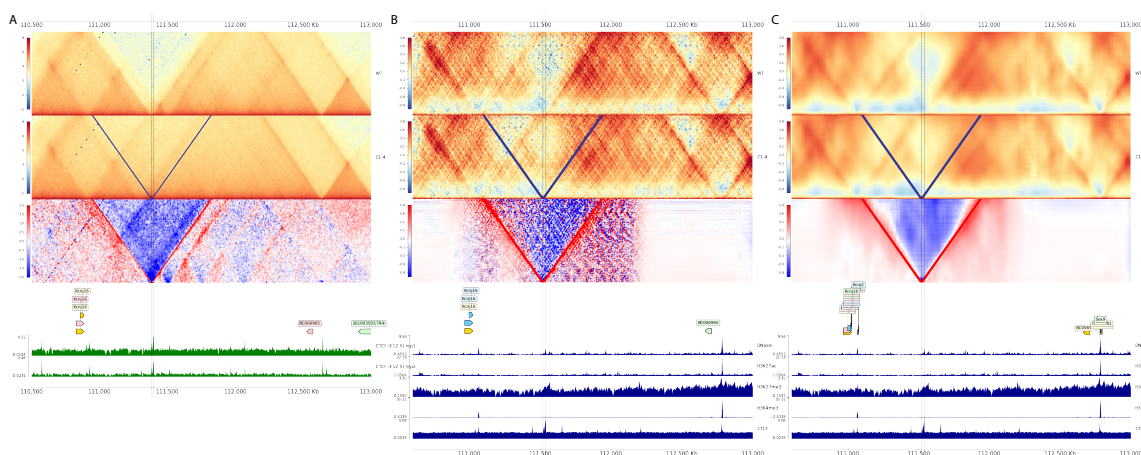

**Supplementary Figure S14: Predicting 3D structural changes after CTCF deletion with the MSE+GAN and MSE-only models.** (A) Ground truth Hi-C map for before perturbation (top), after perturbation (middle), and the absolute difference (bottom) (B) MSE+GAN model prediction for before and after perturbation. (C) MSE-only model prediction for before and after perturbation.
